# Supplementary material for: Tracking health seeking behavior during an Ebola outbreak via mobile phones and SMS
Source: PubMed Central journal article supplement (PMC6550280; doi:10.1038/s41746-018-0055-z), 2018-10-02
Supplement: 41746_2018_55_MOESM1_ESM.pdf [file 41746_2018_55_MOESM1_ESM.pdf]

## Supplementary Information

Tracking Health Seeking Behavior During an Ebola Outbreak via Mobile Phones and SMS  
Feng et al.

### Cellphone penetration in Liberia

Liberia has seen rapid growth of mobile phone penetration in recent years: in 2007 only 30% of Liberian households owned a mobile phone but this figured increased to 65% by the time of the 2013 Demographic and Health Survey (DHS)<sup>1,2</sup> and by the time of the GeoPoll survey in 2015 was anticipated to be much higher.

### Survey Details

| Round | Dates            | Completion Rate (accounting for refusals and non-responses) |
|-------|------------------|-------------------------------------------------------------|
| 1     | March 6-12 2015  | 10.7%                                                       |
| 2     | April 13-15 2015 | 18.1%                                                       |
| 3     | May 18-19 2015   | 18.8%                                                       |
| 4     | June 9-11, 2015  | 18.7%                                                       |

Supplementary Table 1: Survey dates and completion rates

### Survey Questions

Total of 10 questions were included, but only those relevant to the study are outlined below. Questions were translated into Liberian Pigeon according to the language preference of the user (determined by GeoPoll). For responses with options, the response would be via entering the corresponding number. Birth timing question options are as given in the final round of the survey, where May 2014 was 12 months prior. We experimented with different forms of the birth month response question (e.g. by reversing the months) to reduce answer bias due to response order.

| Question                                                             | Options                                                                                                                                                         |
|----------------------------------------------------------------------|-----------------------------------------------------------------------------------------------------------------------------------------------------------------|
| What is your current occupational status?                            | 1) Unemployed 2) Professional or technical or managerial 3) Sales and services 4) Laborer 5) Agriculture 6) Other                                               |
| What is the highest level of school you have attended?               | 1) Primary school 2) Secondary school 3) Post-secondary school 4) No School                                                                                     |
| Are you male or female?                                              | 1) Male 2) Female                                                                                                                                               |
| Have you given birth to a baby in the past year (since May 1, 2014)? | 1) Yes 2) No                                                                                                                                                    |
| When was this baby born?                                             | 1) May 2014 2) Jun 2014 3) Jul 2014 4) Aug 2014 5) Sep 2014 6) Oct 2014 7) Nov 2014 8) Dec 2014 9) Jan 2014 10) Feb 2015 11) Mar 2015 12) Apr 2015 13) May 2015 |

|                           |                                                                                                                           |
|---------------------------|---------------------------------------------------------------------------------------------------------------------------|
| Where was this baby born? | 1) Government health facility or clinic 2) Private health facility or clinic 3) Your home or someone else's home 4) Other |
|---------------------------|---------------------------------------------------------------------------------------------------------------------------|

Supplementary Table 2: Relevant survey questions and the options given

### Costs per Survey

Incentives (\$0.50 per survey), translation, survey and screening fees, plus one-time administration and translation fee for a total of \$6 per survey.

### Propensity score results

|                | <b>GeoPoll<br/>(n=1009)</b> | <b>DHS<br/>(n=1009)</b> | <b>Standardized<br/>mean<br/>differences</b> |
|----------------|-----------------------------|-------------------------|----------------------------------------------|
| <b>Age (%)</b> |                             |                         | 0.123                                        |
| 18             | 41 ( 4.1)                   | 39 ( 3.9)               |                                              |
| 19             | 50 ( 5.0)                   | 52 ( 5.2)               |                                              |
| 20             | 55 ( 5.5)                   | 62 ( 6.1)               |                                              |
| 21             | 57 ( 5.6)                   | 66 ( 6.5)               |                                              |
| 22             | 76 ( 7.5)                   | 59 ( 5.8)               |                                              |
| 23             | 88 ( 8.7)                   | 86 ( 8.5)               |                                              |
| 24             | 42 ( 4.2)                   | 39 ( 3.9)               |                                              |
| 25             | 70 ( 6.9)                   | 64 ( 6.3)               |                                              |
| 26             | 65 ( 6.4)                   | 57 ( 5.6)               |                                              |
| 27             | 52 ( 5.2)                   | 48 ( 4.8)               |                                              |
| 28             | 48 ( 4.8)                   | 46 ( 4.6)               |                                              |
| 29             | 45 ( 4.5)                   | 45 ( 4.5)               |                                              |
| 30             | 39 ( 3.9)                   | 45 ( 4.5)               |                                              |
| 31             | 23 ( 2.3)                   | 22 ( 2.2)               |                                              |
| 32             | 28 ( 2.8)                   | 29 ( 2.9)               |                                              |
| 33             | 19 ( 1.9)                   | 27 ( 2.7)               |                                              |
| 34             | 16 ( 1.6)                   | 22 ( 2.2)               |                                              |
| 35             | 20 ( 2.0)                   | 22 ( 2.2)               |                                              |
| 36             | 34 ( 3.4)                   | 28 ( 2.8)               |                                              |
| 37             | 27 ( 2.7)                   | 27 ( 2.7)               |                                              |
| 38             | 22 ( 2.2)                   | 20 ( 2.0)               |                                              |
| 39             | 28 ( 2.8)                   | 20 ( 2.0)               |                                              |
| 40             | 21 ( 2.1)                   | 23 ( 2.3)               |                                              |
| 41             | 12 ( 1.2)                   | 16 ( 1.6)               |                                              |
| 42             | 7 ( 0.7)                    | 10 ( 1.0)               |                                              |
| 43             | 6 ( 0.6)                    | 10 ( 1.0)               |                                              |
| 44             | 4 ( 0.4)                    | 3 ( 0.3)                |                                              |
| 45             | 3 ( 0.3)                    | 4 ( 0.4)                |                                              |

|                       |            |               |              |
|-----------------------|------------|---------------|--------------|
| 46                    | 3 ( 0.3)   | 7 ( 0.7)      |              |
| 47                    | 4 ( 0.4)   | 5 ( 0.5)      |              |
| 48                    | 0 ( 0.0)   | 4 ( 0.4)      |              |
| 49                    | 4 ( 0.4)   | 2 ( 0.2)      |              |
| <b>Occupation (%)</b> |            |               | <b>0.050</b> |
| Agriculture           | 178 (17.6) | 198<br>(19.6) |              |
| Laborer               | 59 ( 5.8)  | 67 ( 6.6)     |              |
| Other                 | 35 ( 3.5)  | 41 ( 4.1)     |              |
| Professional          | 48 ( 4.8)  | 53 ( 5.3)     |              |
| Sales and services    | 185 (18.3) | 178<br>(17.6) |              |
| Unemployed            | 504 (50.0) | 472<br>(46.8) |              |
| <b>Region (%)</b>     |            |               | <b>0.106</b> |
| Bomi                  | 60 ( 5.9)  | 52 ( 5.2)     |              |
| Bong                  | 102 (10.1) | 111<br>(11.0) |              |
| Gbarpolu              | 10 ( 1.0)  | 12 ( 1.2)     |              |
| Grand Bassa           | 46 ( 4.6)  | 53 ( 5.3)     |              |
| Grand Cape Mount      | 25 ( 2.5)  | 32 ( 3.2)     |              |
| Grand Gedeh           | 70 ( 6.9)  | 55 ( 5.5)     |              |
| Grand Kru             | 9 ( 0.9)   | 6 ( 0.6)      |              |
| Lofa                  | 78 ( 7.7)  | 86 ( 8.5)     |              |
| Margibi               | 93 ( 9.2)  | 84 ( 8.3)     |              |
| Maryland              | 59 ( 5.8)  | 59 ( 5.8)     |              |
| Montserrado           | 244 (24.2) | 261<br>(25.9) |              |
| Nimba                 | 165 (16.4) | 144<br>(14.3) |              |
| River Cess            | 6 ( 0.6)   | 8 ( 0.8)      |              |
| River Gee             | 11 ( 1.1)  | 14 ( 1.4)     |              |
| Sinoe                 | 31 ( 3.1)  | 32 ( 3.2)     |              |
| <b>Education (%)</b>  |            |               | <b>0.069</b> |
| No education          | 43 ( 4.3)  | 46 ( 4.6)     |              |
| Primary               | 256 (25.4) | 267<br>(26.5) |              |
| Secondary             | 626 (62.0) | 603<br>(59.8) |              |
| Higher                | 84 ( 8.3)  | 93 ( 9.2)     |              |

Supplementary Table 3a: Standardized mean differences (SMD) in covariate values across treatment and comparison conditions the difference in the proportions/means across the treatment groups divided by the standard deviation within the treatment group<sup>3</sup> during the outbreak.

|                       | <b>GeoPoll<br/>(n=465)</b> | <b>DHS<br/>(n=465)</b> | <b>Standardized<br/>mean<br/>differences</b> |
|-----------------------|----------------------------|------------------------|----------------------------------------------|
| <b>Age (%)</b>        |                            |                        | 0.231                                        |
| 18                    | 29 ( 6.2)                  | 24 ( 5.2)              |                                              |
| 19                    | 22 ( 4.7)                  | 24 ( 5.2)              |                                              |
| 20                    | 24 ( 5.2)                  | 26 ( 5.6)              |                                              |
| 21                    | 30 ( 6.5)                  | 30 ( 6.5)              |                                              |
| 22                    | 23 ( 4.9)                  | 27 ( 5.8)              |                                              |
| 23                    | 33 ( 7.1)                  | 37 ( 8.0)              |                                              |
| 24                    | 19 ( 4.1)                  | 20 ( 4.3)              |                                              |
| 25                    | 22 ( 4.7)                  | 30 ( 6.5)              |                                              |
| 26                    | 31 ( 6.7)                  | 30 ( 6.5)              |                                              |
| 27                    | 23 ( 4.9)                  | 20 ( 4.3)              |                                              |
| 28                    | 25 ( 5.4)                  | 20 ( 4.3)              |                                              |
| 29                    | 19 ( 4.1)                  | 18 ( 3.9)              |                                              |
| 30                    | 30 ( 6.5)                  | 23 ( 4.9)              |                                              |
| 31                    | 9 ( 1.9)                   | 6 ( 1.3)               |                                              |
| 32                    | 15 ( 3.2)                  | 14 ( 3.0)              |                                              |
| 33                    | 15 ( 3.2)                  | 13 ( 2.8)              |                                              |
| 34                    | 10 ( 2.2)                  | 11 ( 2.4)              |                                              |
| 35                    | 10 ( 2.2)                  | 13 ( 2.8)              |                                              |
| 36                    | 14 ( 3.0)                  | 17 ( 3.7)              |                                              |
| 37                    | 11 ( 2.4)                  | 13 ( 2.8)              |                                              |
| 38                    | 11 ( 2.4)                  | 9 ( 1.9)               |                                              |
| 39                    | 13 ( 2.8)                  | 9 ( 1.9)               |                                              |
| 40                    | 4 ( 0.9)                   | 5 ( 1.1)               |                                              |
| 41                    | 5 ( 1.1)                   | 5 ( 1.1)               |                                              |
| 42                    | 4 ( 0.9)                   | 3 ( 0.6)               |                                              |
| 43                    | 6 ( 1.3)                   | 3 ( 0.6)               |                                              |
| 44                    | 3 ( 0.6)                   | 2 ( 0.4)               |                                              |
| 45                    | 1 ( 0.2)                   | 3 ( 0.6)               |                                              |
| 46                    | 2 ( 0.4)                   | 4 ( 0.9)               |                                              |
| 47                    | 1 ( 0.2)                   | 2 ( 0.4)               |                                              |
| 48                    | 0 ( 0.0)                   | 1 ( 0.2)               |                                              |
| 49                    | 1 ( 0.2)                   | 3 ( 0.6)               |                                              |
| <b>Occupation (%)</b> |                            |                        | 0.075                                        |
| Agriculture           | 81 (17.4)                  | 78 (16.8)              |                                              |
| Laborer               | 39 ( 8.4)                  | 33 ( 7.1)              |                                              |
| Other                 | 30 ( 6.5)                  | 31 ( 6.7)              |                                              |
| Professional          | 31 ( 6.7)                  | 38 ( 8.2)              |                                              |
| Sales and services    | 84 (18.1)                  | 86 (18.5)              |                                              |
| Unemployed            | 200 (43.0)                 | 199<br>(42.8)          |                                              |

|                      |            |            |       |
|----------------------|------------|------------|-------|
| <b>Region (%)</b>    |            |            | 0.170 |
| Bomi                 | 11 ( 2.4)  | 17 ( 3.7)  |       |
| Bong                 | 57 (12.3)  | 61 (13.1)  |       |
| Gbarpolu             | 9 ( 1.9)   | 10 ( 2.2)  |       |
| Grand Bassa          | 23 ( 4.9)  | 25 ( 5.4)  |       |
| Grand Cape Mount     | 9 ( 1.9)   | 14 ( 3.0)  |       |
| Grand Gedeh          | 20 ( 4.3)  | 24 ( 5.2)  |       |
| Grand Kru            | 2 ( 0.4)   | 2 ( 0.4)   |       |
| Lofa                 | 49 (10.5)  | 38 ( 8.2)  |       |
| Margibi              | 35 ( 7.5)  | 41 ( 8.8)  |       |
| Maryland             | 25 ( 5.4)  | 23 ( 4.9)  |       |
| Montserrado          | 124 (26.7) | 120 (25.8) |       |
| Nimba                | 80 (17.2)  | 67 (14.4)  |       |
| River Cess           | 2 ( 0.4)   | 2 ( 0.4)   |       |
| River Gee            | 10 ( 2.2)  | 9 ( 1.9)   |       |
| Sinoe                | 9 ( 1.9)   | 12 ( 2.6)  |       |
| <b>Education (%)</b> |            |            | 0.101 |
| No education         | 14 ( 3.0)  | 18 ( 3.9)  |       |
| Primary              | 99 (21.3)  | 98 (21.1)  |       |
| Secondary            | 269 (57.8) | 251 (54.0) |       |
| Higher               | 83 (17.8)  | 98 (21.1)  |       |

Supplementary Table 3b: Standardized mean differences (SMD) in covariate values across treatment and comparison conditions the difference in the proportions/means across the treatment groups divided by the standard deviation within the treatment group<sup>3</sup> for post outbreak peak.

**Supplementary Figure 1 Legend:** Distribution of propensity scores for treatment (GP) and control (DHS) groups during the outbreak (a and c), and post outbreak peak (b and d), prior to and after the match.

## References

- 1 Demographic and Health Surveys. Liberia - Key Findings. (2007).
- 2 Demographic and Health Surveys. Liberia - Key Findings. (2013).
- 3 Stuart, E. A. Matching methods for causal inference: A review and a look forward. *Statistical science: a review journal of the Institute of Mathematical Statistics* **25**, 1 (2010).
