# Supplementary material for: Tracking health seeking behavior during an Ebola outbreak via mobile phones and SMS
Source: PubMed Central journal article supplement (PMC6550280; doi:10.1038/s41746-018-0055-z), 2018-10-02

**a) Propensity scores - during outbreak (pre-match)**

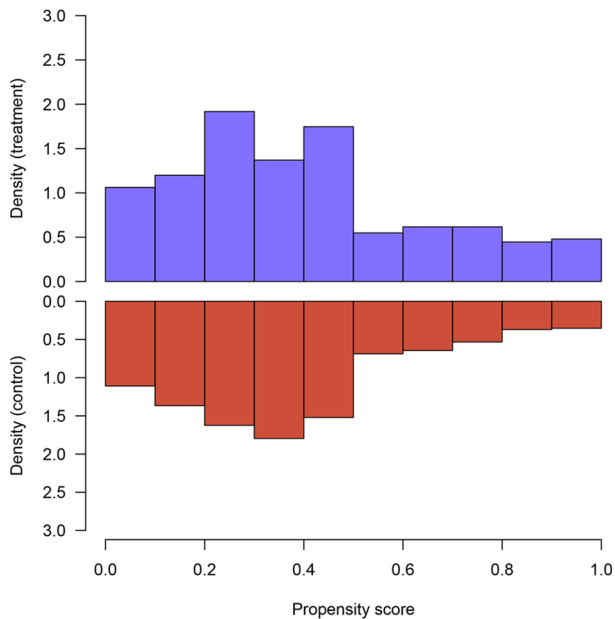

**b) Propensity scores - post peak (pre-match)**

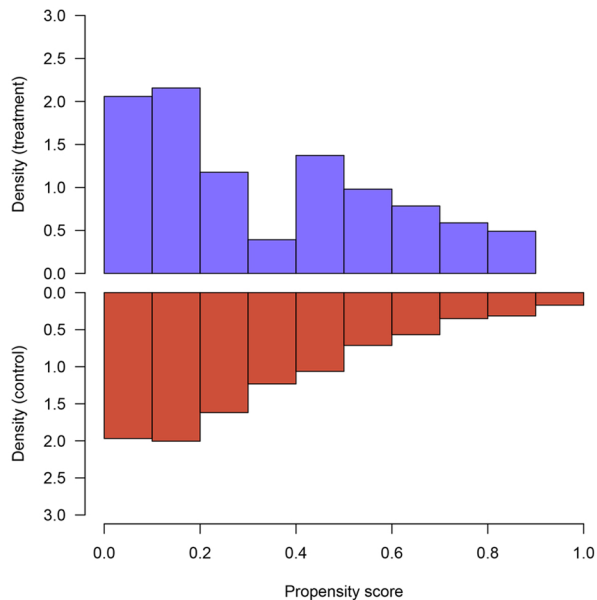

**c) Propensity scores - during outbreak (after match)**

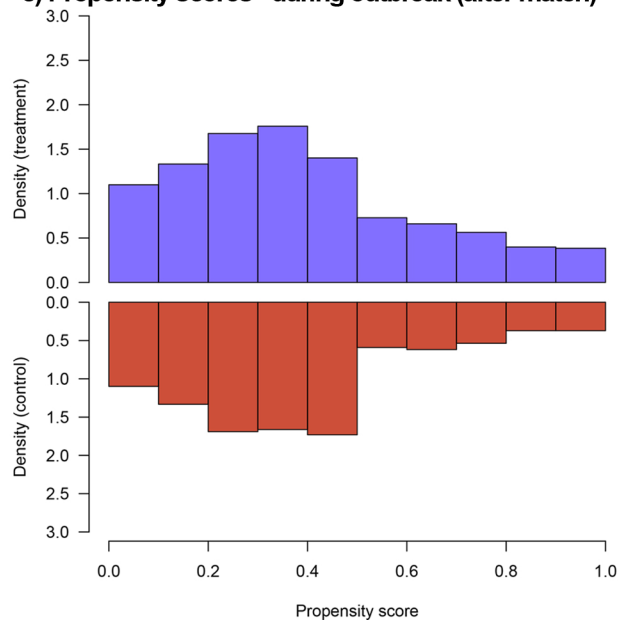

**d) Propensity scores - post peak (after match)**

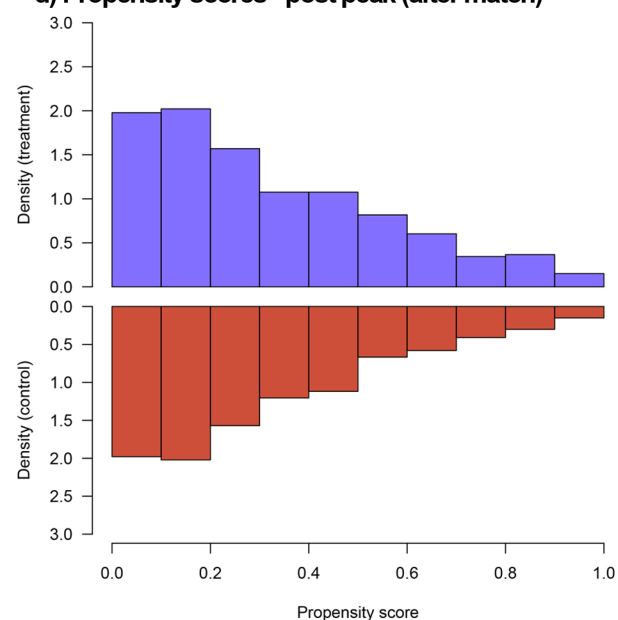

Supplement: 41746_2018_55_MOESM2_ESM.pdf [file 41746_2018_55_MOESM2_ESM.pdf]
